# Supplementary material
Source: Research Square preprint supplement (doi:10.21203/rs.3.rs-9633621/v1)
Supplement: Supplementary file 1 [file a2737f707127dbc2a6a5dc93.docx]

**Appendix Table A1. List of countries studied**

| Aruba | Comoros | Croatia | Mozambique | El Salvador |
| --- | --- | --- | --- | --- |
| Afghanistan | Cape Verde | Haiti | Mauritania | San Marino |
| Angola | Costa Rica | Hungary | Montserrat | Somalia |
| Anguilla | Czechoslovakia | Indonesia | Martinique | Saint Pierre and Miquelon |
| Albania | Cuba | Isle of Man | Mauritius | Serbia |
| Andorra | Curaçao | India | Malawi | South Sudan |
| Netherlands Antilles | Christmas Island | British Indian Ocean Territory | Malaysia | Sao Tome and Principe |
| United Arab Emirates | Cayman Islands | Ireland | Mayotte | Suriname |
| Argentina | Cyprus | Iran, Islamic Republic of | Namibia | Slovakia |
| Armenia | Czech Republic | Iraq | New Caledonia | Slovenia |
| American Samoa | German Democratic Republic | Iceland | Niger | Sweden |
| Antarctica | Germany | Israel | Norfolk Island | Swaziland |
| French Southern Territories | Djibouti | Italy | Nigeria | Sint Maarten |
| Antigua and Barbuda | Dominica | Jamaica | Nicaragua | Seychelles |
| Australia | Denmark | Jordan | Niue | Syrian Arab Republic |
| Austria | Dominican Republic | Japan | Netherlands | Turks and Caicos Islands |
| Azerbaijan | Algeria | Kazakhstan | Norway | Chad |
| Burundi | Ecuador | Kenya | Nepal | Togo |
| Belgium | Egypt | Kyrgyzstan | Nauru | Thailand |
| Benin | Eritrea | Cambodia | Saudi Arabian Iraqi neutral zone | Tajikistan |
| Caribbean Netherlands | Western Sahara | Kiribati | New Zealand | Tokelau |
| Burkina Faso | Spain | Saint Kitts and Nevis | Oman | Turkmenistan |
| Bangladesh | Estonia | Republic of Korea | Pakistan | Timor-Leste |
| Bulgaria | Ethiopia | Kuwait | Panama | Tonga |
| Bahrain | Finland | Lao People's Democratic Republic | Pitcairn | Trinidad and Tobago |
| Bahamas | Fiji | Lebanon | Peru | Tunisia |
| Bosnia and Herzegovina | Falkland Islands (Malvinas) | Liberia | Philippines | Turkey |
| Saint-Barthélemy | France | Libyan Arab Jamahiriya | Palau | Tuvalu |
| Belarus | Faeroe Islands | Saint Lucia | Papua New Guinea | Taiwan |
| Belize | Micronesia, Federated States of | Liechtenstein | Poland | United Republic of Tanzania |
| Bermuda | Gabon | Sri Lanka | Puerto Rico | Uganda |
| Bolivia | United Kingdom of Great Britain and Northern Ireland | Lesotho | Democratic People's Republic of Korea | Ukraine |
| Brazil | Georgia | Lithuania | Portugal | United States Minor Outlying Islands |
| Barbados | Ghana | Luxembourg | Paraguay | Uruguay |
| Brunei Darussalam | Gibraltar | Latvia | Occupied Palestinian Territory | United States of America |
| Bhutan | Guinea | Macao Special Administrative Region of China | French Polynesia | Uzbekistan |
| Bouvet Island | Guadeloupe | Morocco | Qatar | Holy See |
| Botswana | Gambia | Monaco | R_union | Saint Vincent and the Grenadines |
| Central African Republic | Guinea-Bissau | Moldova | Romania | Venezuela (Bolivarian Republic of) |
| Canada | Equatorial Guinea | Madagascar | Russian Federation | British Virgin Islands |
| Cocos Islands | Greece | Maldives | Rwanda | United States Virgin Islands |
| Switzerland | Grenada | Mexico | Saudi Arabia | Viet Nam |
| Chile | Greenland | Marshall Islands | State Union of Serbia and Montenegro | Vanuatu |
| China | Guatemala | The former Yugoslav Republic of Macedonia | Sudan | Wallis and Futuna Islands |
| Côte d'Ivoire | French Guiana | Mali | Senegal | Samoa |
| Cameroon | Guam | Malta | Singapore | Yemen |
| Democratic Republic of the Congo | Guyana | Myanmar | South Georgia and the South Sandwich Islands | Yugoslavia |
| Congo | Hong Kong Special Administrative Region of China | Montenegro | Saint Helena | South Africa |
| Cook Islands | Heard Island and McDonald Islands | Mongolia | Solomon Islands | Zambia |
| Colombia | Honduras | Northern Mariana Islands | Sierra Leone | Zimbabwe |

Source: Author’s compilation
